# Supplementary material for: Effects of empagliflozin on renal sodium and glucose handling in patients with acute heart failure
Source: PubMed Central journal article supplement — Eur J Heart Fail. 2020 Dec 16;23(1):68–78. doi: 10.1002/ejhf.2066 (PMC8048437; doi:10.1002/ejhf.2066), 2020-12-16

# Interaction between history of diabetes mellitus and fractional excretion of glucose

Diabetes mellitus type 2  
No Yes

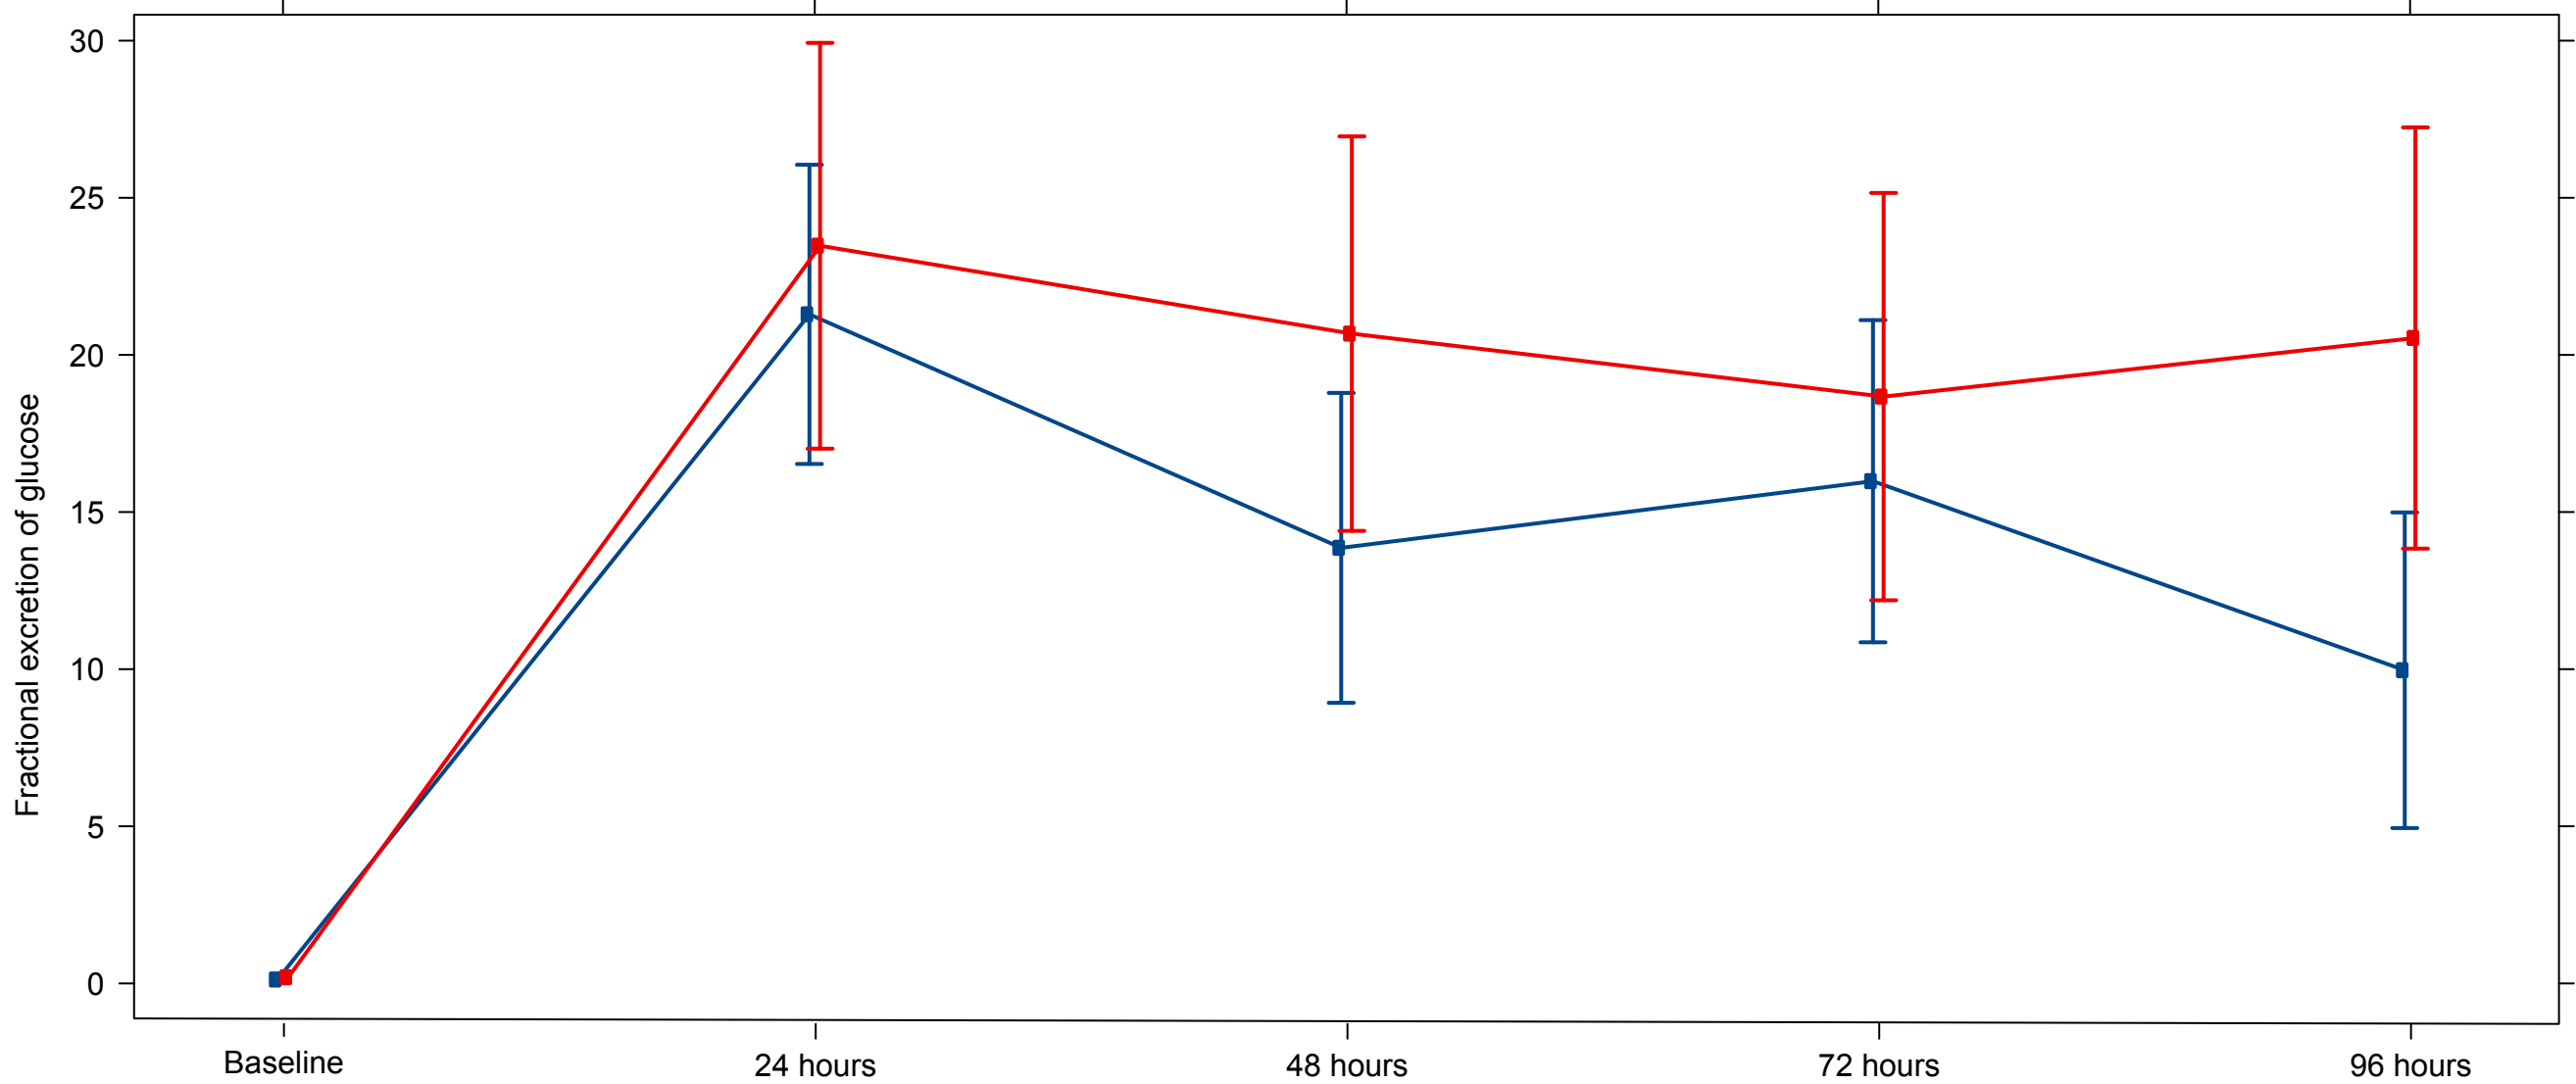

Supplement: EJHF-23-68-s001.pdf [file EJHF-23-68-s001.pdf]
