# Supplementary figures and images for: Effects of empagliflozin on renal sodium and glucose handling in patients with acute heart failure
Source: PubMed Central journal article supplement — Eur J Heart Fail. 2020 Dec 16;23(1):68–78. doi: 10.1002/ejhf.2066 (PMC8048437; doi:10.1002/ejhf.2066), 2020-12-16

**A.** Adj R2 = 0.0333 Intercept = 0.819 Slope = -0.203 P = 0.15

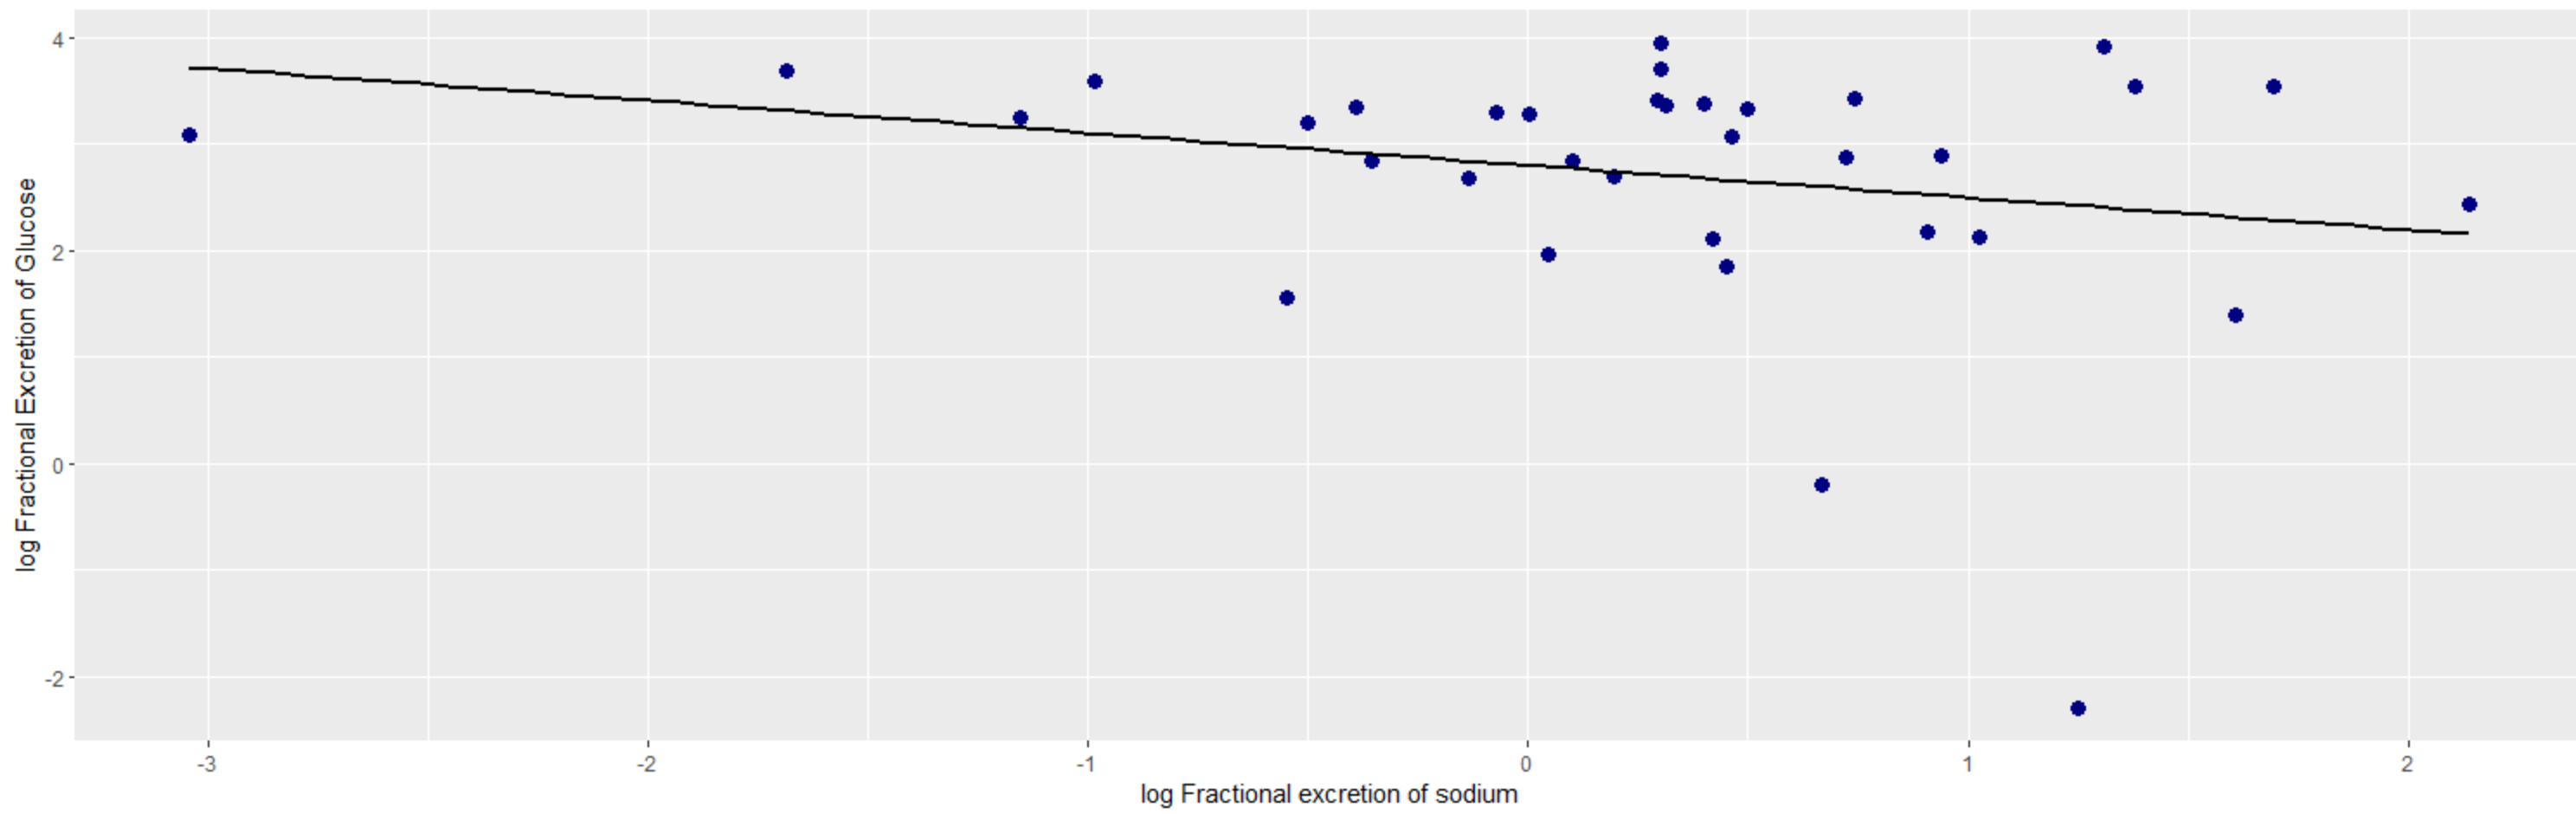

**B.** Adj R2 = -0.0171 Intercept = -1630 Slope = -232 P = 0.454

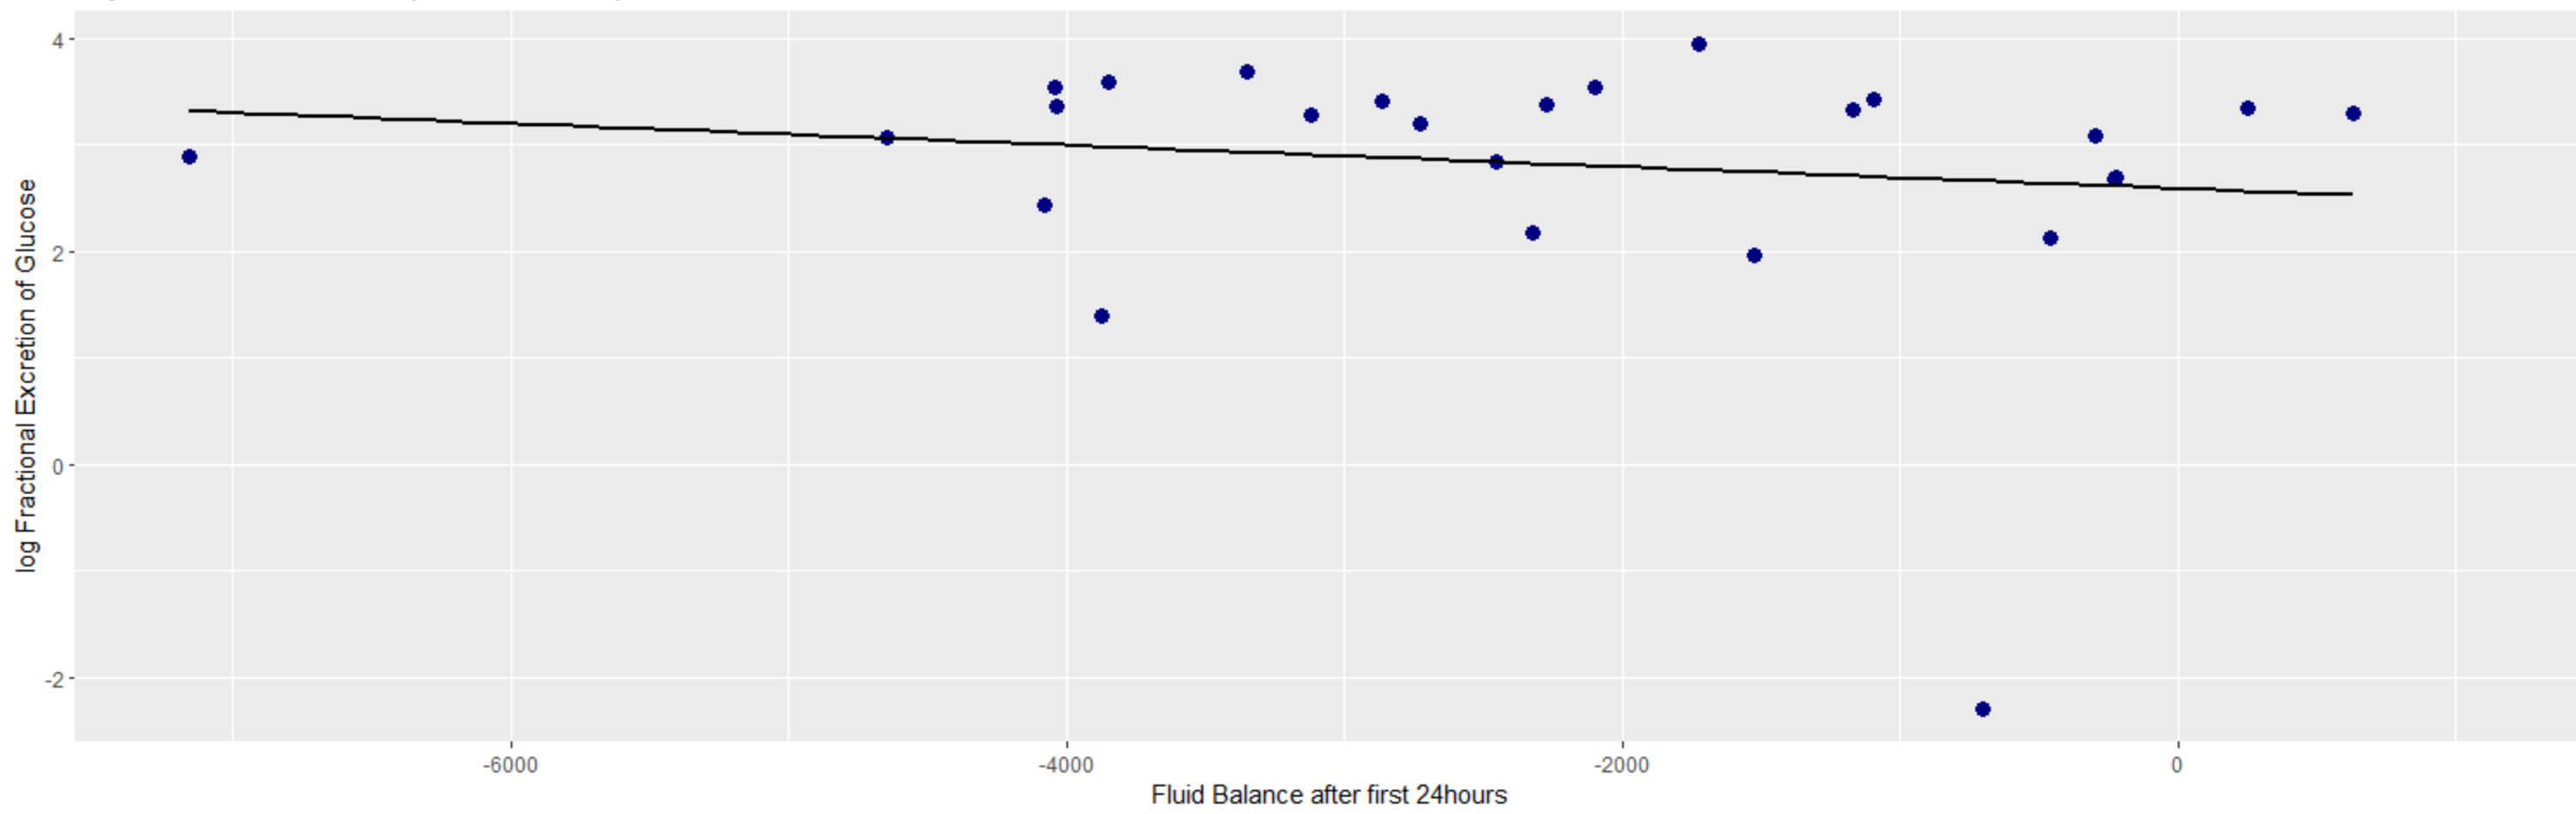

**C.** Adj R2 = -0.0171 Intercept = -2040 Slope = -576 P = 0.0886

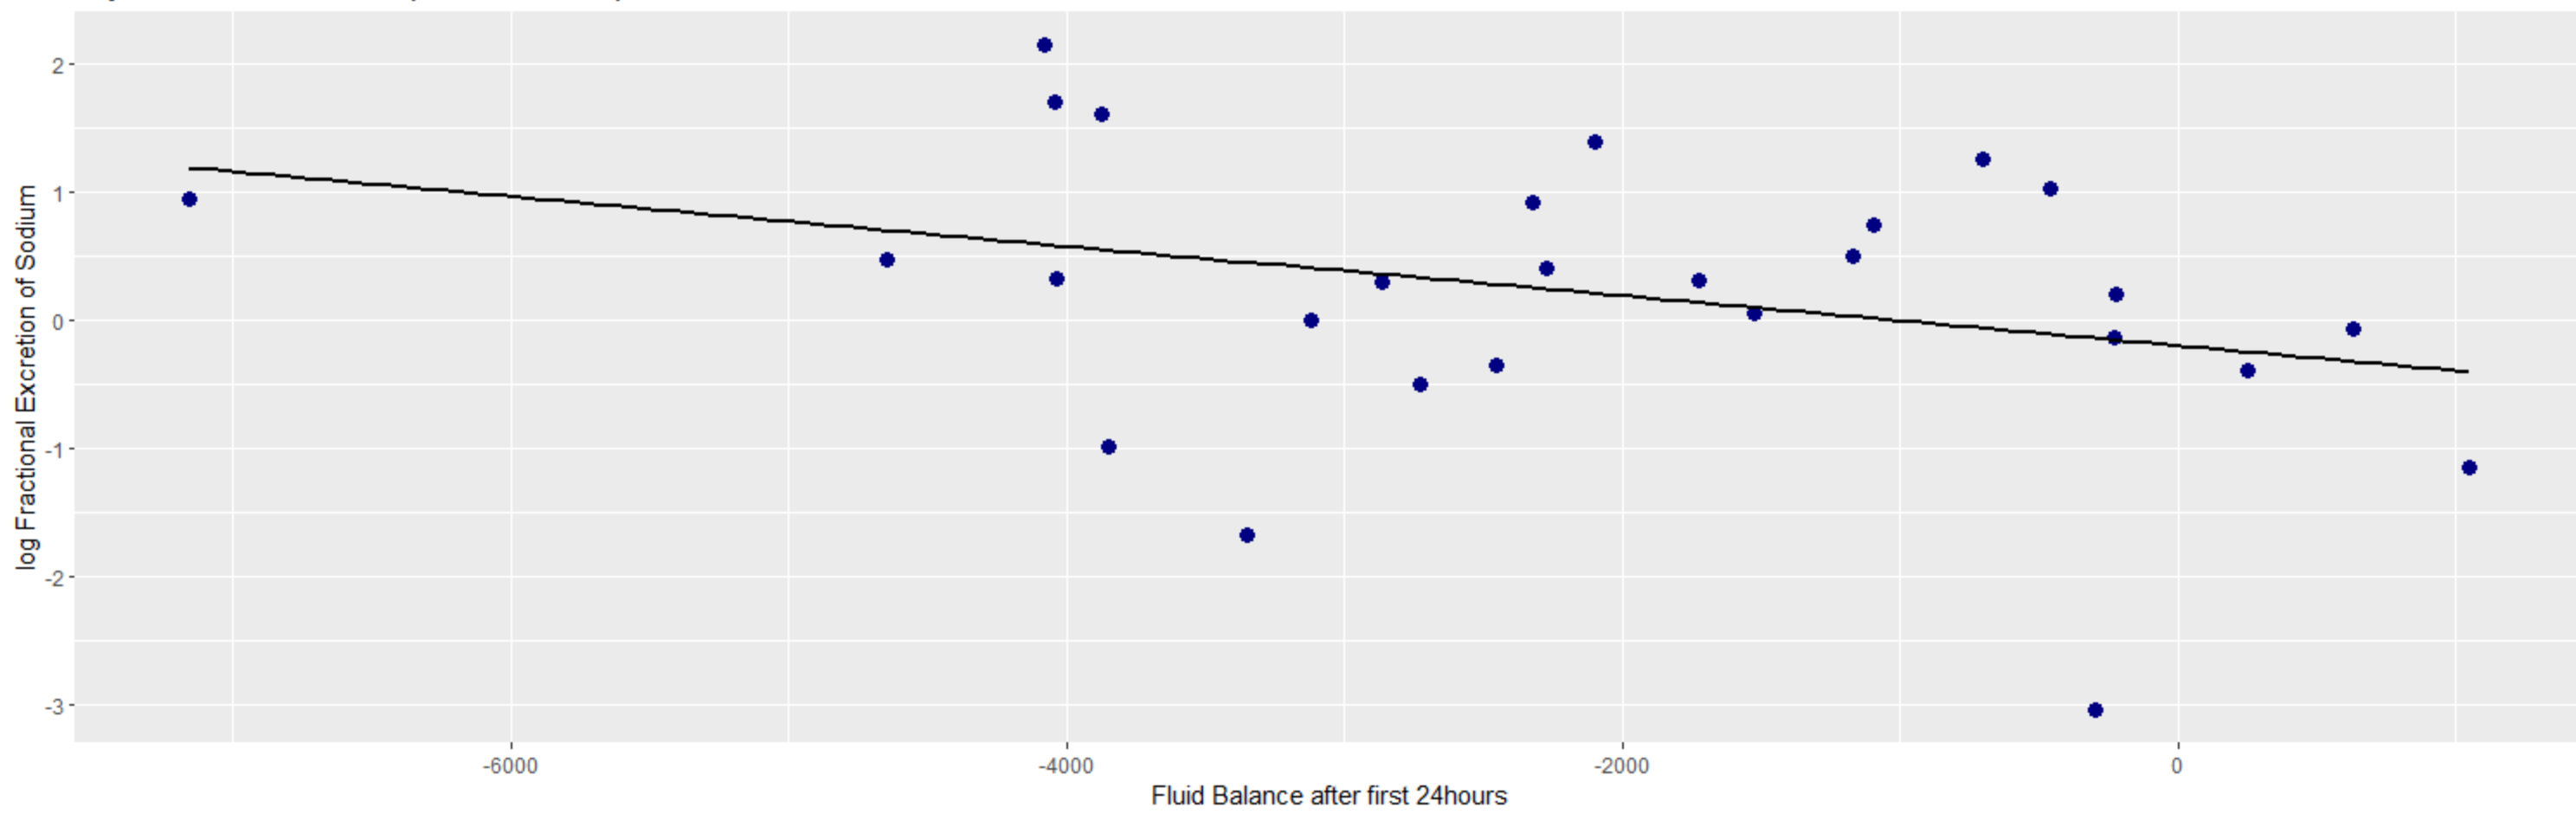

Supplement: EJHF-23-68-s002.pdf [file EJHF-23-68-s002.pdf]
